# Supplementary material for: Why Is Tinnitus a Problem? A Qualitative Analysis of Problems Reported by Tinnitus Patients
Source: PubMed Central journal article supplement (PMC6277754; doi:10.1177/2331216518812250), 2018-11-28
Supplement: R1.pdf [file R1.pdf]

**SUPPLEMENTAL INFORMATION 1. Euclidian distances between problems in an 18-dimensional space**

|                              | Constant Awareness | Emotional Reaction | Loss of Peace | Loss of Quiet | Emotional Consequences | Feeling Imperfect | Inability to Concentrate | Loss of Control | Fear      | Effect on Listening | Quality of Life | Physical Effects of Tinnitus | Intrusiveness | Effect on Sleep | Need for Knowledge | Unpleasantness of Percept | Loss of Sense of Self | Annoyance |
|------------------------------|--------------------|--------------------|---------------|---------------|------------------------|-------------------|--------------------------|-----------------|-----------|---------------------|-----------------|------------------------------|---------------|-----------------|--------------------|---------------------------|-----------------------|-----------|
| Constant Awareness           | 0                  |                    |               |               |                        |                   |                          |                 |           |                     |                 |                              |               |                 |                    |                           |                       |           |
| Emotional Reaction           | 11                 | 0                  |               |               |                        |                   |                          |                 |           |                     |                 |                              |               |                 |                    |                           |                       |           |
| Loss of Peace                | 10.099505          | 7.1414284          | 0             |               |                        |                   |                          |                 |           |                     |                 |                              |               |                 |                    |                           |                       |           |
| Loss of Quiet                | 12.369317          | 10.488088          | 9.2195445     | 0             |                        |                   |                          |                 |           |                     |                 |                              |               |                 |                    |                           |                       |           |
| Emotional Consequences       | 11.61895           | 9.1651514          | 7.8102497     | 10.677078     | 0                      |                   |                          |                 |           |                     |                 |                              |               |                 |                    |                           |                       |           |
| Feeling Imperfect            | 12.206556          | 9.8994949          | 8.4261498     | 11.224972     | 10.099505              | 0                 |                          |                 |           |                     |                 |                              |               |                 |                    |                           |                       |           |
| Inability to Concentrate     | 12.489996          | 10.535654          | 9.486833      | 11.61895      | 11                     | 11.445523         | 0                        |                 |           |                     |                 |                              |               |                 |                    |                           |                       |           |
| Loss of Control              | 11.661904          | 9.539392           | 7.8740079     | 10.908712     | 9.7467943              | 9.6436508         | 11.135529                | 0               |           |                     |                 |                              |               |                 |                    |                           |                       |           |
| Fear                         | 13.601471          | 11.224972          | 10.630146     | 12.884099     | 12                     | 12.083046         | 13.076697                | 11.61895        | 0         |                     |                 |                              |               |                 |                    |                           |                       |           |
| Effect on Listening          | 11.575837          | 8.8881944          | 7.6157731     | 10.535654     | 9.3273791              | 10.049876         | 10.677078                | 9.591663        | 11.532563 | 0                   |                 |                              |               |                 |                    |                           |                       |           |
| Quality of Life              | 14.247807          | 12.328828          | 11.18034      | 13.190906     | 12.165525              | 12.806248         | 13.304135                | 12.4499         | 14.142136 | 12.041595           | 0               |                              |               |                 |                    |                           |                       |           |
| Physical Effects of Tinnitus | 10.440307          | 7.4833148          | 5.9160798     | 9.486833      | 8.1240384              | 8.9442719         | 9.8488578                | 8.5440037       | 10.954451 | 7.9372539           | 11.489125       | 0                            |               |                 |                    |                           |                       |           |
| Intrusiveness                | 10.440307          | 7.6157731          | 5.7445626     | 9.1651514     | 8                      | 8.8317609         | 9.6436508                | 7.9372539       | 10.488088 | 7.9372539           | 11.224972       | 6.3245553                    | 0             |                 |                    |                           |                       |           |
| Effect on Sleep              | 11.575837          | 9                  | 7.7459667     | 10.630146     | 9.539392               | 10.246951         | 10.77033                 | 9.797959        | 11.532563 | 9.486833            | 12.4499         | 7.9372539                    | 8.0622577     | 0               |                    |                           |                       |           |
| Need for Knowledge           | 10.488088          | 7.2801099          | 5.4772256     | 9.3273791     | 7.9372539              | 8.660254          | 9.591663                 | 8.1240384       | 10.440307 | 7.7459667           | 11.357817       | 6.0827625                    | 5.9160798     | 7.8740079       | 0                  |                           |                       |           |

|                                  |               |               |               |               |               |               |               |               |               |               |               |               |               |               |               |               |               |   |
|----------------------------------|---------------|---------------|---------------|---------------|---------------|---------------|---------------|---------------|---------------|---------------|---------------|---------------|---------------|---------------|---------------|---------------|---------------|---|
| Unpleasant<br>ness of<br>Percept | 10.488<br>088 | 7.8102<br>497 | 6             | 9.4339<br>811 | 8.1853<br>528 | 8.8881<br>944 | 9.6953<br>597 | 8.2462<br>113 | 10.816<br>654 | 8.1240<br>384 | 11.532<br>563 | 6.5574<br>385 | 6.4031<br>242 | 8.1240<br>384 | 6             | 0             |               |   |
| Loss of<br>Sense of<br>Self      | 11.090<br>537 | 8.3666<br>003 | 6.7082<br>039 | 9.8994<br>949 | 8.8317<br>609 | 9.2736<br>185 | 10.049<br>876 | 9.1104<br>336 | 11.313<br>708 | 8.5440<br>037 | 11.916<br>375 | 7.2111<br>026 | 6.9282<br>032 | 8.7749<br>644 | 6.8556<br>546 | 7.2801<br>099 | 0             |   |
| Annoyance                        | 11.789<br>826 | 11.135<br>529 | 9.8488<br>578 | 11.916<br>375 | 11.045<br>361 | 11.916<br>375 | 12.288<br>206 | 11.269<br>428 | 13.564<br>66  | 11.090<br>537 | 13.856<br>406 | 10            | 10.099<br>505 | 11.090<br>537 | 9.8488<br>578 | 10.344<br>08  | 10.583<br>005 | 0 |
